# Supplementary material for: Identification and characterization of two families of F420H2-dependent reductases from Mycobacteria that catalyse aflatoxin degradation
Source: PubMed Central journal article supplement (PMC3034190; doi:10.1111/j.1365-2958.2010.07356.x), 2010-11
Supplement: mmi0078-0561-SD1.pdf [file mmi0078-0561-SD1.pdf]

1 **Supplementary Methods–**

2

3 **PNPOx PMP to PLP conversion assay.** The rate of PMP conversion to PLP by the  
4 FMN dependent MSMEG\_5675 was determined using 0.5  $\mu$ M of the enzyme  
5 incubated with 200 $\mu$ M PMP and 100 $\mu$ M FMN in Tris pH 7.5, time points were taken  
6 every time 10 minutes and quantified on an Agilent 1200 HPLC based on previously  
7 published methods (Bisp *et al.*, 2002). Briefly, PLP and PMP were separated on a  
8 Phenomenex (USA) Synergi 2.5 $\mu$  hydro-RP 100A column equilibrated with 1-  
9 octanesulfonic acid and 1.2mM triethylamine with 33mM phosphoric acid, adjusted to  
10 pH 2.15 with KOH (mobile phase A) at 1ml/min. The compounds were separated over  
11 a linear gradient from 0% acetonitrile to 20% acetonitrile over 1 min followed by an  
12 increase to 40% acetonitrile over 4.5 minutes, the column was subsequently re-  
13 equilibrated in mobile phase A, prior to the subsequent injection. Rates were  
14 determined as the loss of the substrate against a standard curve and calculated using  
15 Chemstation.

16

17

18

1 **Fig. S1** Thin layer chromatograms of aflatoxin degradation by *M. smegmatis* and  
2 transposon mutated strains. For panel A, *M. smegmatis* soluble extract was incubated  
3 with aflatoxin overnight and separated by TLC: lane 1, aflatoxin only; lane 2,  
4 aflatoxin and soluble extract; lane 3 aflatoxin and boiled soluble extract. Panel B is a  
5 representative TLC of cultures of *M. smegmatis* transposon mutants incubated for 19  
6 hours with aflatoxin; the culture names are shown. Sequencing of the three mutants  
7 unable to degrade aflatoxin shown here revealed that the transposon had inserted in  
8 the N-terminal half of FGD for 8.11G and the C-terminal half of FbiC for 17.7G and  
9 19.7E.

10

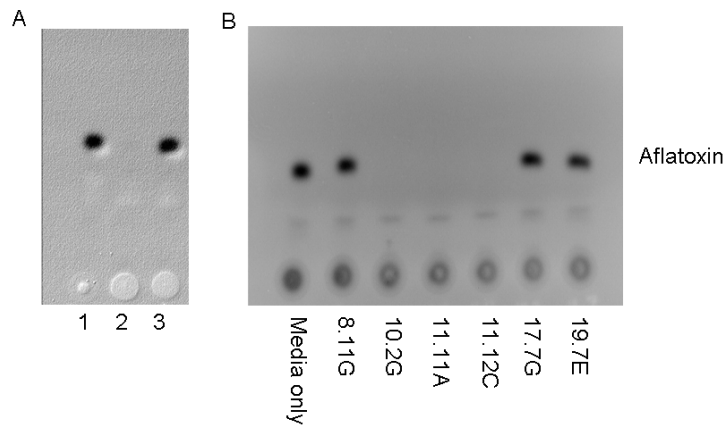

11

12

13

1 **Fig. S2. Biosynthetic pathways of the cofactors F<sub>420</sub> and FMN.** Both FMN (yellow  
 2 box) and F<sub>420</sub> (green box) utilize the same biosynthetic pathway from GTP to a  
 3 phosphorylated intermediate (5-amino-6-ribityl-2butanone 4-phosphate). Riboflavin is  
 4 synthesized by the condensation of the dephosphorylated intermediate with a four-  
 5 carbon precursor (red) derived from ribulose 5-phosphate and subsequently re-  
 6 phosphorylated to form FMN. Alternatively, in *Mycobacteria*, FbiC catalyzes the  
 7 formation of Fo by condensation of the dephosphorylated intermediate with the 4-  
 8 hydroxy-phenylpyruvate (red). FbiA and FbiB catalyze the addition of the  
 9 phospholactone and  $\gamma$ -linked glutamates, respectively. FGD utilizes glucose-6-  
 10 phosphate to reduce F<sub>420</sub> to F<sub>420</sub>H<sub>2</sub>, which is subsequently utilized as a cofactor for  
 11 FDR catalyzed reactions.

12  
 13

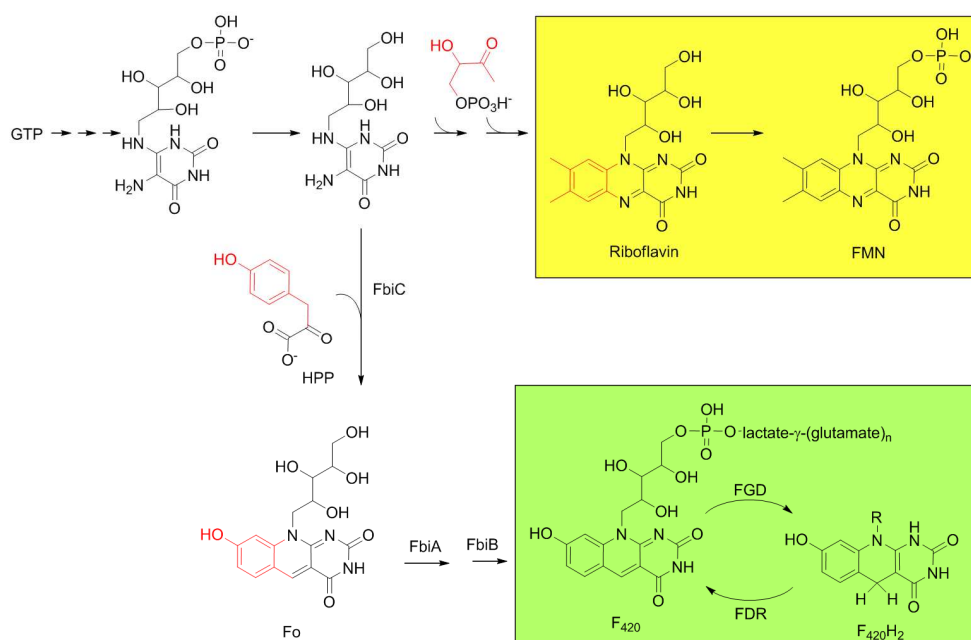

14  
 15

1 **Fig. S3. Gel filtration chromatography of AFG1 degrading fractions from *M.***  
2 ***smegmatis*.** Molecular weight standards (panels A and E) and three fractions from *M.*  
3 *smegmatis* (panels B - D) were separated by gel filtration chromatography. The  
4 retention time and molecular weight of the standards are shown, and the active  
5 fractions from the *M. smegmatis* purified fractions are highlighted. The molecular  
6 weights of the active fractions were calculated by plotting the molecular weight  
7 standards. The three *M. smegmatis* fractions were purified by a 40-70% ammonium  
8 sulfate cut followed by hydrophobic interaction chromatography prior to the gel  
9 filtration chromatography.

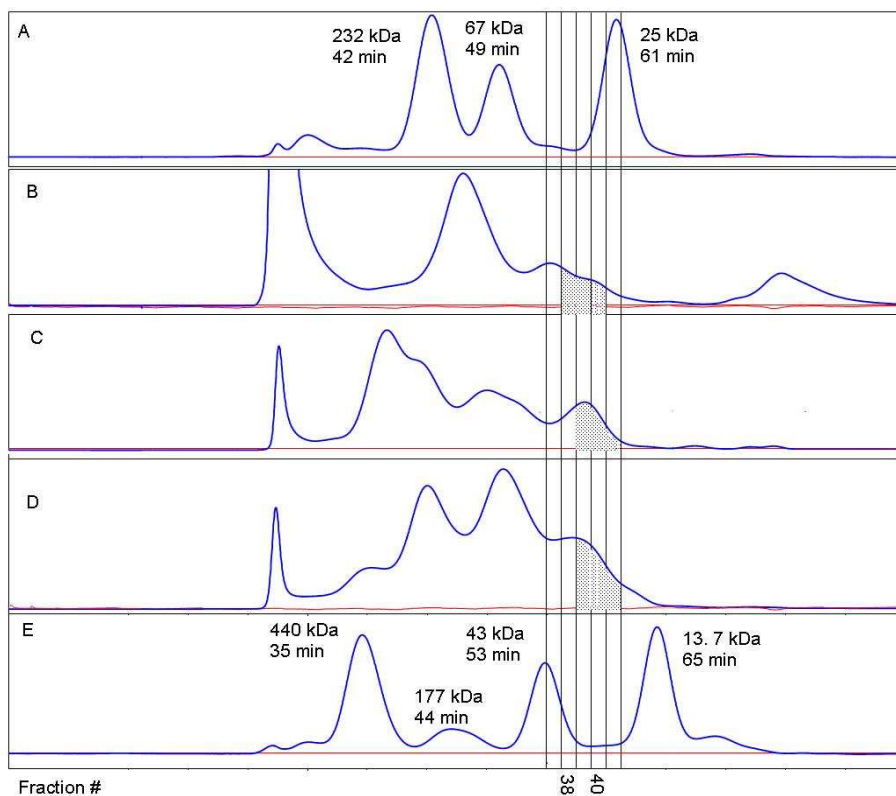

10

1 **Fig. S4. Sequence alignment and structural domains.** Amino acid sequences of the  
2 FDR-A and -B enzymes from *M. smegmatis* were aligned and the secondary structural  
3 elements of MSMEG\_3356 and MSMEG\_3380 shown (panel A and B, respectively).  
4 Panel C shows the alignment of the PNPOx enzymes from *M. smegmatis*  
5 (MSMEG\_5675), *M. tuberculosis* (rv2607), *H. sapiens* and *E. coli* with the secondary  
6 structural elements of rv2607 shown (Pedelacq *et al.*, 2006).  $\beta$  strands are shown as  
7 blue arrows and  $\alpha$  helices as red cylinders. Identical amino acids are shown as red  
8 letters, conserved residues as blue, homologous residues as green, and weakly similar  
9 grey. The yellow triangles highlight the highly conserved glycine residue in the loop  
10 between  $\beta$  strands 1 and 2. The yellow diamond highlights the conserved (putative)  
11 phosphate binding residue, Trp in FDR-A and Lys in FDR-B and PNPOx.

1  
2

A

3356 (1) MSAPSDMSQVQDFRANGRRVGGFEFG--APMVLVHVHVGKTKGAAYTPMVLPSDDPFTIYFASRAGAASNAWYXLLTATQAVYVQ--TETVAVGVTEVCEGDRIRVTSQARRYP--TETVAVGVTEVCEGDRIRVTSQARRYP--GEADYEKKTAGI--RTIPVLALET  
 2027 (4) AELSTDMVAREQERILLEGQTTDGVHVDRIVLTITGAKSCKRKYVPLMVEENGK--YMWASRGGDPKHSVFNKVFNTSVSQDQ--DKVLPDRTARELEGEERHMKLAVAYVP--PVARYQDTEK--RLIPVIVE  
 2350 (4) AIDMDQNNQVLEKFRRETGKAGGLEFG--SPVLVHHTGAKSGORLPLVLLDGR--IYFGSGKAGSDHDMVHLVNFVDFVVELG--TETFPVKARVLTCARDEIYAKQAVAP--QEGYQAKTT--RVIPVVELQV  
 3004 (15) TAALDDFNKVVBFRAAGKVGQGFEN--GTLILLHTGAKSGORLPLVLLDGR--IYFGSGKAGSDHDMVHLVNFVDFVVELG--TETFPVKARVLTCARDEIYAKQAVAP--QEGYQAKTT--RVIPVVELQV  
 5230 (6) RYIGPLALLHDVKYKATGRIGHRTPGQPAULIHLIVGAKTCGRBASLAVRGGDQ--YLVASGKPKAKQVHNLKADPNVNLVGP--KLARATARAVPDDPDPFRLWEIVNMGKDR--VIGYQKETT--ROIPVILTFVS  
 5215 (30) FEARHVAHHTDQLFLRFBG--ELNWS--LINAPLVITGAKSGERBEVOLTVEHDQD--YLVASGKPKAKQVHNLKADPNVNLVGP--KLARATARAVPDDPDPFRLWEIVNMGKDR--VIGYQKETT--ROIPVILTFVS  
 5376 (22) GTLLKWSRQDFLFTTNGKLNKELGTFVGLITLIGKSGPRDTLLELQGR--YLVASGKPKAKQVHNLKADPNVNLVGP--KLARATARAVPDDPDPFRLWEIVNMGKDR--VIGYQKETT--ROIPVILTFVS  
 6325 (39) AIWKAMPYFVLLKATGRRLNSV--IHLAVITSGANSCKRQATALAFTDQD--YLVASGKPKAKQVHNLKADPNVNLVGP--KLARATARAVPDDPDPFRLWEIVNMGKDR--VIGYQKETT--ROIPVILTFVS  
 3909 (35) ALHRHMLADKRLHDTGTRVRFGRV--MPLVLRITGKASGVREYLAFTDQD--YLVASGKPKAKQVHNLKADPNVNLVGP--KLARATARAVPDDPDPFRLWEIVNMGKDR--VIGYQKETT--ROIPVILTFVS  
 1377 (6) RHPVPSHKLFRAPLSEFRANIGMGRLLHHTGKGRREVLVEHPDQFG--AYVAGWG--PKAAVTRVLAERVTIYQGRITAVTALPLQ--EGEAITFARVAVREYVAKHLLPRLMG--FVNSGLEDPRAGQCFPIRIVERTEG  
 1981 (1) ---MSARQVAFENKRFNPA--EATLTPMPLVYGLTEHVHKSCKYCELPVLFETHG--YAILVYG--POIDMLKRVLAGQVTLKRG--RAIAGFRVSVKKAALAVAPRSMWLYR--VFPYDEATLLTHHGSAG  
 5376 (1) ---MLLADERARENRENKRIVPLPSKAVMMSLEHLGRRSGIYRITVTFVRYAG--VAILLPYG--BDRDWVRLNLAARGGRAWIG--ETFEVTDRIPTAEVWRPRLGRPWAVG--RLETE--SALVLRITD--

B

3380 (1) -HVAIPGYESILLERPLXGHLATVRDGTQVNI--AMWEAMDGEVLEFTHTKKQKRNKANKPVAHSVDPDNP-----YRLEVYGLVEDIIVP-----DPTGAFYLLKLDKRDVGGPLTEFPACKADRVLIIVRPTAFSKQ  
 0048 (8) KIWSDDELAEFVRSKATMATVLDGRPHLV-----AMWAVVDGEIWFETKAKSKAVNLRDPTVLLDGHYI-----DTLRVGIQSWERTYGTIDMRFPVDMNRRNLAIVRPGTRSDMHRKLGHPAMPJGGSSTAQDINS  
 6848 (1) -MGVSPARQLVDAPFVATIDPDGAPQSS-----VWVGRODDVLFVAVGSKRKNLRDRPVSLLSPDDE-----YTVAVIHGKATLHTBG-----GQLRDALAVYTKYCYAEGNDAAARVGOVAMVWRVPTVGRV  
 5170 (2) GROVDDKLLALDNLSGLVATIKODGRPLSNV--SYHEDPRAQTEQVITPRAKTNLRDRPVSLLSPDDE-----WAVAVAGDALITPFAASTHDDVTEGLIALRNTISGEHDWDFQAMVDORVLMTLPTHVGNPQGM  
 3880 (8) ATTRLITDALAFITRERLAMLITLRSDSGPHVAV--GTFDPKTHIARVITGGSKANVAPQ--ERGVAVLSQDQ-----ARWLSLEKSTVSS-----DPDAVDAELRYAQRVTPVAVRPRVVIIVRIERVLSGSELLDRS  
 1668 (30) DIGRPTAADFTGERHROLLITLTKRSGEAVFS-----PINHGVAQSKLVYRTEASTAKVKEIRNIPVAVIWPCTLSGR-----SCEPVACTARILGSE-----HARADAVIANKSIPKMLPEKTLDRSOTEPVMAVTEISZAGTGTGTPPS  
 3863 (1) -MAITFADVAKSKYLLITLTKDGRKPT-----AMRAPGDELLIYTEENSHVAVKIRNIPVAVIWPCTLSGR-----PKSFAVEAHAILDKSP-----FG-----EYDAIGSRVGLMGKAPNLSKLRAGHSHGLIIBAKERTA  
 0964 (3) PFEQIAPAVEMHSHVWASNAIVDADGRSRLVHIFWEDFGLFEGHIAVTPSVRAILIAHPASLWYAPNHDTCBAEGLVYTDDETCLMWDKFNANGPAPVGDPLI:PQRGGTSPFEPAALRLAFLRULRUMEGTVMWAGEGEPILMQS  
 5777 (2) ALPKERBOFLAEFHIALSVYAGKGGPLTV-----IWTQSPGGEVWVLTGGERKRLHIESAGRTLWVRELEPT-----YRVVAVDGVYVRIEAT-----DUHIVVTRKYRLEAFKVDGDTLETARREGESVWVFPFPHWLSADGGSV  
 2791 (1) ---MKLINDAAREFIGNSADATVAMPDGEVQATVWAFESTPDGDELVTAHLSRHKRVRNRDRPVRTIADPGRVQK-----WGRVYLSLITGTRIVGEG-----AKOLLKRLAQLAARDSDGFFPELAPESWTLRIDKQVGNQPMWS  
 5879 (1) ---MTFKPHEIAYQADLGRLATQDGTQNSPVGFTNEQLGTLIDAGVMSQSKYRNARNRVAVVDDIFSRDP-----WVRVCLIEIETGABQMTSG-----AMGAGDELDAALIRITPRALISFGDDQDQTPPHQLKADIRVY  
 6576 (3) ATSDAPDFRSLIAEARIGLVATIKANGJQLSPV--TFYDRAADITVSDGDRKAKTNLRDRPVALETRADQ-----NAWATAGETVLTGFGTDHGEVEALVEYRKAZAGHEVMSVMSDRRVMKLSVQRVYGERLR  
 6485 (8) ADPVNDELDDVFRPHRWLUITRADGSLQSSPV--TGGVDAQGRIVATVYFQ--RAKASANIRKTRPRASVWVLSDEFN-----GPFVQVQDGEAVIG--LP--DAVEPLVYRVTISGEHDWDFQAMVDQKGLIIRVTPKQMGVATGQFPPE

C

iv2607 (16) RRLNDQAQAGYS--EENAVLATV--ADGKVTVRSVLCGLIDRESGAFFTSYKAGQGLAVTPYASATFPWQLGRQVQVQPSKSTEEIETVWSMFRGAILGAMVSOQS RFSVGSQAQLNDQALAEVTRRFAQDQIETVFPNGGYSIAPETVFFQGGHEHMHNIIVAN  
 5675 (51) QTVLNDAMKAGLP--DANAVVGTVDADGPRVIRVLSKVDGDTFTFYNYGAKGHELANAVASATFPWQLGRQVHVGAVTVKVAETVWSRFSRQGLGAMVSOQS RFLASRALQLAEVTRRFAQDQIETVFPNGGYSIAPETVFFQGGHEHMHNIIVAN  
 E.coli (36) ERMLSQACAKLIA--DPTAMVAVTDEHGQPYQIRVLLKHYDEKGMVYTNLCSKKAHQIENNERVSLFPWHTLRQVAVIGKAEISLSTLEWKMVPHSFRPSQIGAMVSIKQSR--SANG--LESKTLLEIKQFC--QGEVLEPSFWGGVRLSQIIFWQGGHEHMHNIIVAN  
 Human (63) AAWFEAVQCPDIGEANACLIATCTRDGKPSARMLLLKGFHGDGRFETNFESKGEKELDSNPFASLVFVWBPILNRQVAVGSPVKKLEEEGACVPHSEKSKQIGAVVSHQSSV:PDDEYLRKKNIEELQLYQ--DQEVLEPKSNWGGVLYLPQVMBFQGG:TWRLHDLIVRERGLFTGDSPLGPMTHRGEEDWLYERLAP

1 **Table S1** – Proteomics/mass spec data

| TIGR locus tag MSMEG | NCBI accession number | MW    | Distinct peptides | %AA coverage | Mean Peptide Spectral Intensity | Pfam designation | E value             | Phyre Fold E value to Rv2991* |
|----------------------|-----------------------|-------|-------------------|--------------|---------------------------------|------------------|---------------------|-------------------------------|
| 3380                 | ABK72884              | 14629 | 4                 | 38           | $1.42 \times 10^6$              | pfam01243        | $6 \times 10^{-13}$ | $2.5 \times 10^{-14}$         |
| 2027                 | ABK75334              | 18021 | 5                 | 55           | $2.42 \times 10^7$              | pfam04075        | $4 \times 10^{-33}$ | $6.3 \times 10^{-3}$          |
| 5717                 | ABK72164              | 15873 | 3                 | 24           | $6.49 \times 10^6$              | pfam01243        | $7 \times 10^{-6}$  | $6.6 \times 10^{-15}$         |
| 3004                 | ABK74167              | 16489 | 6                 | 56           | $6.55 \times 10^6$              | pfam04075        | $8 \times 10^{-32}$ | $1.3 \times 10^{-3}$          |

2 \*Phyre analysis of all proteins gave the lowest E value scores to *M. tuberculosis*  
 3 protein rv2991 (non published sequence coordinates available on Phyre). They belong  
 4 to the FMN-binding split barrel superfamily, PNP-oxidase like enzymes.

5

6

1 **Table S2** – Number of putative FDR-A and -B enzymes in the *Actinomycetale* species  
 2 referred to in this study.

| Species                                               | Genome accession number | # of putative proteins |       |       |
|-------------------------------------------------------|-------------------------|------------------------|-------|-------|
|                                                       |                         | PNPO <sub>x</sub>      | FDR-A | FDR-B |
| <i>M. smegmatis</i>                                   | CP000480                | 1                      | 15    | 13    |
| <i>M. tuberculosis</i><br><i>H37Rv</i>                | BX842578                | 1                      | 6     | 7     |
| <i>M. vanbaalenii</i>                                 | CP000511                | 1                      | 13    | 20    |
| <i>Rhodococcus jostii</i> sp. <i>RH1</i> <sup>1</sup> | CP000631                | 1                      | 13    | 12    |
| <i>Arthobacter</i> sp. <i>FB24</i> <sup>2</sup>       | CP000454                | 1                      | 0     | 1     |
| <i>Streptomyces coelicolor</i>                        | AL939116                | 1                      | 4     | 11    |
| <i>Frankia alni</i>                                   | CT573213                | 1                      | 18    | 17    |
| <i>Nocardioides</i> sp. <i>JS614</i>                  | CP000509                | 1                      | 4     | 5     |
| <i>M. Gilvum</i> <sup>3</sup>                         | CP000656                | 1                      | 12    | 11    |

3

4 1. *Rhodococcus jostii* sp. *RH1* shares 96% nucleotide identity in 16S DNA  
 5 sequence to the aflatoxin degrading *N. corynebacterioides* (DSM20151)  
 6 referred to in the text. No 16S DNA was available for *R. erythropolis* (DSM  
 7 14303).

8 2. The genome sequence of *Arthobacter* sp. *FB24* was used for *Arthobacter* sp.  
 9 *KW-ES* as it shared 98% sequence identity to the 16S DNA.

10 3. *M. Gilvum* shared 97% identity to the 16S DNA sequence of the aflatoxin  
 11 degrading *M. fluoranthenivorans* (DSM 44556)

12

13

14

15



1 **Table S3** – Primers for the expression work

| Primer name          | Family | Sequence                                                                           |
|----------------------|--------|------------------------------------------------------------------------------------|
| 5126 attB1           | FbiC   | AAAAAGCAGGCTTAGTGGATGAATCTCGACTC                                                   |
| 5126 attB2           | FbiC   | AGAAAGCTGGGTACTACGCGGCCAGGGGCGC                                                    |
| 3380 attB1           | FDR-P  | AAAAAGCAGGCTCCATGGTCGCCGTGC                                                        |
| 3380 attB2           | FDR-P  | AGAAAGCTGGGTCTACTGCTTGCTGAACG                                                      |
| 5717 attB1           | FDR-P  | AAAAAGCAGGCTCGATGGCCCTTCCCAAAG                                                     |
| 5717 attB2           | FDR-P  | AGAAAGCTGGGTTCAGACCGAGCCCAGG                                                       |
| 0048 attB1           | FDR-P  | AAAAAGCAGGCTTAATGTCCGACGAGGAGATC                                                   |
| 0048 attB2           | FDR-P  | AGAAAGCTGGGTATCACGAGTTCAGGTACTG                                                    |
| 2791 attB1           | FDR-P  | AAAAAGCAGGCTTAATGAACTCAACGACGCCG                                                   |
| 2791 attB2           | FDR-P  | AGAAAGCTGGGTATCACGACACCCAGGGGCC                                                    |
| 5675 attB1           | FDR-P  | AAAAAGCAGGCTTAGTGGGGATACCGGACGAT                                                   |
| 5675 attB2           | FDR-P  | AGAAAGCTGGGTACTAGGGCTGGAGCCGTTC                                                    |
| 5819 attB1           | FDR-P  | AAAAAGCAGGCTTATTGAGGTCCTACCGTGCC                                                   |
| 5819 attB2           | FDR-P  | AGAAAGCTGGGTATCAGACCGTTTCGTATATC                                                   |
| 6848 attB1           | FDR-P  | AAAAAGCAGGCTTAGTGGGGACGTTTGTCAATTC                                                 |
| 6848 attB2           | FDR-P  | AGAAAGCTGGGTATCAGAGCCGGCCGACGGT                                                    |
| 5170 attB1           | FDR-P  | AAAAAGCAGGCTTAATGGGGGCGCGTCAGGTG                                                   |
| 5170 attB2           | FDR-P  | AGAAAGCTGGGTATCAGCGCATGCCGGGCGGCA                                                  |
| 2027 attB1           | FDR-A  | AAAAAGCAGGCTTAGTGACACCTGCGCAC                                                      |
| 2027 attB2           | FDR-A  | AGAAAGCTGGGTCTATTCGACGATGAACACG                                                    |
| 3004 attB1           | FDR-A  | AAAAAGCAGGCTTAATGACCGACGATTCGATC                                                   |
| 3004 attB2           | FDR-A  | AGAAAGCTGGGTGGCGCGGATCAATTCCG                                                      |
| 3356 attB1           | FDR-A  | AAAAAGCAGGCTTAATGAGCGCACCTGAGGAC                                                   |
| 3356 attB2           | FDR-A  | AGAAAGCTGGGTACTACGTGCGCGTGAGGGC                                                    |
| 5998 attB1           | FDR-A  | AAAAAGCAGGCTTAATGGCCGACACTTCCCGT                                                   |
| 5998 attB2           | FDR-A  | AGAAAGCTGGGTACTAAGCCGGTTCGCAGAT                                                    |
| 2850 attB1           | FDR-A  | AAAAAGCAGGCTTAATGAACAACCAGGTGATC                                                   |
| 2850 attB2           | FDR-A  | AGAAAGCTGGGTATCAGACGCGCTGCAACTC                                                    |
| 5030 attB1           | FDR-A  | AAAAAGCAGGCTTATTGCTGCACGACAAGGTC                                                   |
| 5030 attB2           | FDR-A  | AGAAAGCTGGGTACTAGCTCACGGGCGTCAG                                                    |
| AttB1 adapter        |        | GGGGACAAGTTTGTACAAAAAAGCAGGCT                                                      |
| AttB2 adapter        |        | GGGGACCACTTTGTACAAGAAAGCTGGGT                                                      |
| FGD forward          | FGD    | CGCATATGGCTGAATTGAAGCTAGGTTAC                                                      |
| FGD reverse          | FGD    | CGGGATCCTCAGGCCAGCTTGCGCAACCG                                                      |
| pDONR201 seq forward |        | TCGCGTTAACGCTAGCATGGATCTC                                                          |
| pDONR201 seq reverse |        | GTAACATCAGAGATTTTGAGACAC                                                           |
| 3380TEV attB1        |        | <b>GGGGACAAGTTTGTACAAAAAAGCAGGCT</b> TAGAAAACCTGTATTTT<br>CAGGGAAATGGTCGCCGTGCCCGA |
| 3356TEV attB1        |        | <b>GGGGACAAGTTTGTACAAAAAAGCAGGCT</b> TAGAAAACCTGTATTTT                             |

1

2

|  |  |        |
|--|--|--------|
|  |  | CAGGGA |
|--|--|--------|
